# Supplementary material
Source: Springer Nature journal article supplement (https://www.springermedizin.de/resource/supplementary/12969_2007_28_MOESM1_ESM.pdf/9592238)
Supplement: MOESM1 [file 9592238]

Appendix A: Verbatim Responses for First Delphi Questionnaire

| <b>DISEASE/MANIFESTATION</b>                                                                                                                                                                                                                                      | <b>TREATMENT</b>                                                                                                                                                                                                                                                                                                                                                                                                    |
|-------------------------------------------------------------------------------------------------------------------------------------------------------------------------------------------------------------------------------------------------------------------|---------------------------------------------------------------------------------------------------------------------------------------------------------------------------------------------------------------------------------------------------------------------------------------------------------------------------------------------------------------------------------------------------------------------|
| <b>Juvenile Idiopathic Arthritis</b>                                                                                                                                                                                                                              |                                                                                                                                                                                                                                                                                                                                                                                                                     |
| Systemic onset JIA                                                                                                                                                                                                                                                | <ul style="list-style-type: none"> <li>- No treatment suggested</li> <li>- Thalidomide</li> <li>- TNF blockers and thalidomide</li> <li>- Hydroxychloroquine in combination with standard therapy</li> <li>- Oral IVIG as adjuvant therapy</li> <li>- Anakinra</li> <li>- Anti-IL-6 receptor antibody</li> <li>- Standard protocols depending on disease activity</li> <li>- Thalidomide and cyclosporin</li> </ul> |
| JIA temporomandibular joint arthritis                                                                                                                                                                                                                             | - Corticosteroid joint injections                                                                                                                                                                                                                                                                                                                                                                                   |
| Pauciarticular juvenile rheumatoid arthritis                                                                                                                                                                                                                      | - Intraarticular steroids for therapy                                                                                                                                                                                                                                                                                                                                                                               |
| Early polyarticular juvenile rheumatoid arthritis                                                                                                                                                                                                                 | - CTLA4-Ig                                                                                                                                                                                                                                                                                                                                                                                                          |
| Juvenile rheumatoid arthritis unresponsive to disease-modifying                                                                                                                                                                                                   | - DMARDS - Expand indications and label changes                                                                                                                                                                                                                                                                                                                                                                     |
| JIA                                                                                                                                                                                                                                                               | - Silymarin                                                                                                                                                                                                                                                                                                                                                                                                         |
| Lipid profiles in JIA                                                                                                                                                                                                                                             | - Patients on TNF inhibitors compared to those children not on TNF inhibitors                                                                                                                                                                                                                                                                                                                                       |
| <b>Juvenile Dermatomyositis (JDM)</b>                                                                                                                                                                                                                             |                                                                                                                                                                                                                                                                                                                                                                                                                     |
| JDM                                                                                                                                                                                                                                                               | <ul style="list-style-type: none"> <li>- Multi-institutional, mechanism-focused study</li> <li>- Suggestion IV pulse steroid with oral steroids versus suggestion IV pulse steroid with oral steroids + methotrexate</li> </ul>                                                                                                                                                                                     |
| JDM unresponsive to prednisone and DMARDS                                                                                                                                                                                                                         | - Enbrel/Infliximab                                                                                                                                                                                                                                                                                                                                                                                                 |
| Calcinosis in JDM                                                                                                                                                                                                                                                 | <ul style="list-style-type: none"> <li>- Bisphosphonates vs. diltiazem</li> <li>- Diltiazem, pamidronate, or immunosuppressive approaches, with solid outcome measures</li> <li>- Therapy with diltiazem + alendronate versus diltiazem alone</li> </ul>                                                                                                                                                            |
| <b>Henoch Schonlein Purpura</b>                                                                                                                                                                                                                                   |                                                                                                                                                                                                                                                                                                                                                                                                                     |
| Henoch Schonlein Purpura                                                                                                                                                                                                                                          | <ul style="list-style-type: none"> <li>- Glucocorticoid treatment</li> <li>- Steroids early</li> </ul>                                                                                                                                                                                                                                                                                                              |
| Henoch Schonlein Purpura with abdominal angina                                                                                                                                                                                                                    | - Short course steroid therapy                                                                                                                                                                                                                                                                                                                                                                                      |
| <b>Systemic Lupus Erythematosus (SLE)</b>                                                                                                                                                                                                                         |                                                                                                                                                                                                                                                                                                                                                                                                                     |
| SLE proliferative nephritis unresponsive to pulse cyclophosphamide and mycophenolate mofetil                                                                                                                                                                      | - Combination pulse cyclophosphamide and mycophenolate mofetil                                                                                                                                                                                                                                                                                                                                                      |
| Pediatric SLE                                                                                                                                                                                                                                                     | - Mycophenolate mofetil                                                                                                                                                                                                                                                                                                                                                                                             |
| Severe SLE<br>1. Who are good or partial responders to cyclophosphamide but acquired high cumulative doses of cyclophosphamide over the years, or 2. who are poor responders to cyclophosphamide, or 3. who are high risk for adverse effects of cyclophosphamide | - Intravenous fludarabine as a cyclophosphamide sparing agent                                                                                                                                                                                                                                                                                                                                                       |
| SLE patients with antiphospholipid antibodies                                                                                                                                                                                                                     | - ASA vs ASA/warfarin for the prevention of thromboembolic events                                                                                                                                                                                                                                                                                                                                                   |

|                                                                                                                          |                                                                                                                                                   |
|--------------------------------------------------------------------------------------------------------------------------|---------------------------------------------------------------------------------------------------------------------------------------------------|
| Thrombocytopenia unresponsive to standard therapy in SLE                                                                 | - Rituximab infusions versus conventional therapy.                                                                                                |
| <b>SCLERODERMA</b>                                                                                                       |                                                                                                                                                   |
| Scleroderma                                                                                                              | - Steroids and methotrexate<br>- Cyclophosphamide vs. Bone Marrow Transplant (with PRES)                                                          |
| Localized scleroderma                                                                                                    | - Methotrexate vs. placebo<br>- Methotrexate vs. prednisone<br>- Methotrexate vs. penicillamine with or without steroids<br>- Methotrexate orally |
| Morphea and linear scleroderma – new onset                                                                               | - Methotrexate weekly<br>- Methotrexate orally<br>- Methotrexate                                                                                  |
| Linear scleroderma refractory to oral or subcutaneous methotrexate treatment.                                            | - Oral mycophenolate mofetil                                                                                                                      |
| <b>IMMUNOGENICITY</b>                                                                                                    |                                                                                                                                                   |
| Immunization of children on biologics or immunosuppressive medication                                                    | - Physiotherapy approaches: Significance of correcting leg length discrepancy<br>- Efficacy of MMF in childhood lupus                             |
| The immunogenicity of hepatitis B vaccine in pediatric patients with rheumatic diseases on immunosuppressive medications | - No treatment                                                                                                                                    |
| <b>UVEITIS (Iritis)</b>                                                                                                  |                                                                                                                                                   |
| Uveitis (JRA, sarcoid, or idiopathic) not responsive to methotrexate                                                     | - Infliximab                                                                                                                                      |
| JRA uveitis unresponsive to methotrexate                                                                                 | - Infliximab                                                                                                                                      |
| Methotrexate-resistant uveitis                                                                                           | - Infliximab                                                                                                                                      |
| Uveitis                                                                                                                  | - Multicentre Study                                                                                                                               |
| Pauciarticular JRA with associated uveitis within the first six months of diagnosis                                      | - Early induction treatment                                                                                                                       |
| Resistant or recurrent uveitis in pauciarticular JIA.                                                                    | - Infliximab                                                                                                                                      |
| Iritis associated with JRA and idiopathic iritis unresponsive to methotrexate and/or cyclosporin                         | - Infliximab                                                                                                                                      |
| Refractory iritis in JRA                                                                                                 | - Cyclosporin                                                                                                                                     |
| <b>OTHER TYPES</b>                                                                                                       |                                                                                                                                                   |
| EBV lymphoproliferative disease                                                                                          | - No treatment suggested                                                                                                                          |
| Arthritis of Blau syndrome                                                                                               | - No treatment suggested                                                                                                                          |
| Sarcoid arthritis                                                                                                        | - Enbrel                                                                                                                                          |
| Acute rheumatic fever                                                                                                    | - Naproxen                                                                                                                                        |
| Lupus nephritis in children and the use of immunosuppressive therapy.                                                    | - Send survey, gather info, develop a registry                                                                                                    |
| Idiopathic retro-orbital pseudotumor                                                                                     | - Combination therapy: pulse corticosteroid + weekly methotrexate +/- cyclosporin                                                                 |
| Behcet disease                                                                                                           | - Infliximab                                                                                                                                      |
| Familial Mediterranean fever not responsive to colchicine                                                                | - Anakinra                                                                                                                                        |
| Chronic recurrent multifocal Osteomyelitis (CRMO) that is not controlled by                                              | - Bisphosphonates                                                                                                                                 |

|                                                                                                                                                                                                                                                             |                                                                            |
|-------------------------------------------------------------------------------------------------------------------------------------------------------------------------------------------------------------------------------------------------------------|----------------------------------------------------------------------------|
| NSAIDs and/or that requires corticosteroids                                                                                                                                                                                                                 |                                                                            |
| CRMO/SAPHO (Synovitis, Acne, Pustulosis, Hyperostosis, Osteitis)/DSOM (Diffuse Sclerosing Osteomyelitis of the Mandible)                                                                                                                                    | - Bisphosphonates in children                                              |
| Rash of SLE or JDM                                                                                                                                                                                                                                          | - Topical tacrolimus                                                       |
| Raynaud's 1 <sup>o</sup> and 2 <sup>o</sup>                                                                                                                                                                                                                 | - Biofeedback                                                              |
| Macrophage activation syndrome                                                                                                                                                                                                                              | - Cyclosporin +/- corticosteroids                                          |
| What is the rate of bone fracture in children with :<br>a) SLE, JRA, JDM prior to therapy<br>b) The above diseases, after immunosuppressive therapy (0-5 years) controlling for all medications/supplements<br>c) Are the rates of bone fracture different? | - Vitamin D--the various preparations<br>- Fosamax and other possibilities |
| Consensus conference for standard of care of a few diseases.                                                                                                                                                                                                |                                                                            |
| Study a very rare disease by characterizing it better clinically and trying to understand the pathogenic mechanisms better by collecting biologic samples (e.g. macrophage activation syndrome)                                                             |                                                                            |

JRA: Juvenile Rheumatoid Arthritis  
 JIA: Juvenile Idiopathic Arthritis  
 MTX: Methotrexate  
 SLE: Systemic Lupus Erythematosus  
 MMF: mycophenolate mofetil  
 JDM: Juvenile Dermatomyositis  
 DMARDs: Disease-Modifying Anti-Rheumatic Drugs  
 NSAIDs: Non-Steroidal Anti-Inflammatory Drugs  
 IVIG: Intravenous Immunoglobulin  
 PRES: Pediatric Rheumatology European Society  
 ASA: Acetylsalicylic Acid  
 TNF: Tumor Necrosis Factor
